# Supplementary material for: Development and Content Validation of a Brief French Tool for Self-Assessment of Supportive and Palliative Care Needs in Patients with Cancer: The ACCOmPAgNE Tool
Source: Hindawi journal article supplement (doi:10.1155/2023/8825102), 2023-09-13
Supplement: f1 [file 8825102.f1.pdf]

Article title: Development and content validation of a brief French tool for self-assessment of supportive and palliative care needs in patients with cancer: the ACCOmPAgNE tool.

Journal name: European Journal of Cancer Care, a multidisciplinary journal for cancer research – from prevention to palliation

Appendix 1: French version of the ACCOmPAgNE tool.

| <div> <div>2</div> <div>JE REPONDS A<br/>TOUTES LES QUESTIONS<br/>POUR CE THEME</div> </div> <div> <div>1</div> <div>JE COMMENCE PAR<br/>LIRE UN THEME</div> </div> | Quelle est l'importance<br>que j'accorde à ce<br>thème ?<br><br>0 aucune<br>1 faible<br>2 moyenne<br>3 forte | En ce moment, est-ce<br>que je ressens une<br>difficulté en lien avec<br>ce thème ?        | Quelle est<br>l'intensité de<br>cette difficulté ?<br><br>1 faible<br>2 moyenne<br>3 forte | A quel point cette<br>difficulté est<br>pénible pour moi ?<br><br>1 faiblement<br>2 moyennement<br>3 fortement | Est-ce que je souhaite<br>de l'aide des<br>professionnels de<br>santé vis-à-vis de cette<br>difficulté ? |
|---------------------------------------------------------------------------------------------------------------------------------------------------------------------|--------------------------------------------------------------------------------------------------------------|--------------------------------------------------------------------------------------------|--------------------------------------------------------------------------------------------|----------------------------------------------------------------------------------------------------------------|----------------------------------------------------------------------------------------------------------|
| Les symptômes physiques de ma maladie et les effets indésirables des traitements                                                                                    | 0 – 1 – 2 – 3                                                                                                | <input type="checkbox"/> oui<br><input type="checkbox"/> non (je passe au thème suivant  ) | 1 – 2 – 3                                                                                  | 1 – 2 – 3                                                                                                      | <input type="checkbox"/> oui <input type="checkbox"/> non                                                |
| Mon autonomie physique, ma capacité à effectuer seul(e) les gestes du quotidien                                                                                     | 0 – 1 – 2 – 3                                                                                                | <input type="checkbox"/> oui<br><input type="checkbox"/> non (je passe au thème suivant  ) | 1 – 2 – 3                                                                                  | 1 – 2 – 3                                                                                                      | <input type="checkbox"/> oui <input type="checkbox"/> non                                                |
| L'image que j'ai de mon corps                                                                                                                                       | 0 – 1 – 2 – 3                                                                                                | <input type="checkbox"/> oui<br><input type="checkbox"/> non (je passe au thème suivant  ) | 1 – 2 – 3                                                                                  | 1 – 2 – 3                                                                                                      | <input type="checkbox"/> oui <input type="checkbox"/> non                                                |
| Mon intimité, ma vie sexuelle                                                                                                                                       | 0 – 1 – 2 – 3                                                                                                | <input type="checkbox"/> oui<br><input type="checkbox"/> non (je passe au thème suivant  ) | 1 – 2 – 3                                                                                  | 1 – 2 – 3                                                                                                      | <input type="checkbox"/> oui <input type="checkbox"/> non                                                |
| Mes émotions, mon moral                                                                                                                                             | 0 – 1 – 2 – 3                                                                                                | <input type="checkbox"/> oui<br><input type="checkbox"/> non (je passe au thème suivant  ) | 1 – 2 – 3                                                                                  | 1 – 2 – 3                                                                                                      | <input type="checkbox"/> oui <input type="checkbox"/> non                                                |
| Ma capacité à m'adapter à la maladie                                                                                                                                | 0 – 1 – 2 – 3                                                                                                | <input type="checkbox"/> oui<br><input type="checkbox"/> non (je passe au thème suivant  ) | 1 – 2 – 3                                                                                  | 1 – 2 – 3                                                                                                      | <input type="checkbox"/> oui <input type="checkbox"/> non                                                |
| Ma spiritualité,<br>le sens que je donne à ma vie                                                                                                                   | 0 – 1 – 2 – 3                                                                                                | <input type="checkbox"/> oui<br><input type="checkbox"/> non (je passe au thème suivant  ) | 1 – 2 – 3                                                                                  | 1 – 2 – 3                                                                                                      | <input type="checkbox"/> oui <input type="checkbox"/> non                                                |
| Mes activités sociales : associations,<br>loisirs, travail, etc.                                                                                                    | 0 – 1 – 2 – 3                                                                                                | <input type="checkbox"/> oui<br><input type="checkbox"/> non (je passe au thème suivant  ) | 1 – 2 – 3                                                                                  | 1 – 2 – 3                                                                                                      | <input type="checkbox"/> oui <input type="checkbox"/> non                                                |
| Ma place vis-à-vis de mes<br>proches (famille, amis, etc.)                                                                                                          | 0 – 1 – 2 – 3                                                                                                | <input type="checkbox"/> oui<br><input type="checkbox"/> non (je passe au thème suivant  ) | 1 – 2 – 3                                                                                  | 1 – 2 – 3                                                                                                      | <input type="checkbox"/> oui <input type="checkbox"/> non                                                |
| Le soutien de mon entourage                                                                                                                                         | 0 – 1 – 2 – 3                                                                                                | <input type="checkbox"/> oui<br><input type="checkbox"/> non (je passe au thème suivant  ) | 1 – 2 – 3                                                                                  | 1 – 2 – 3                                                                                                      | <input type="checkbox"/> oui <input type="checkbox"/> non                                                |
| Mon accompagnement médical et social<br>dans sa globalité                                                                                                           | 0 – 1 – 2 – 3                                                                                                | <input type="checkbox"/> oui<br><input type="checkbox"/> non (je passe au thème suivant  ) | 1 – 2 – 3                                                                                  | 1 – 2 – 3                                                                                                      | <input type="checkbox"/> oui <input type="checkbox"/> non                                                |
| L'information relative à ma maladie et à<br>ses traitements                                                                                                         | 0 – 1 – 2 – 3                                                                                                | <input type="checkbox"/> oui<br><input type="checkbox"/> non (je passe au thème suivant  ) | 1 – 2 – 3                                                                                  | 1 – 2 – 3                                                                                                      | <input type="checkbox"/> oui <input type="checkbox"/> non                                                |
| La communication avec les soignants                                                                                                                                 | 0 – 1 – 2 – 3                                                                                                | <input type="checkbox"/> oui<br><input type="checkbox"/> non (je passe au thème suivant  ) | 1 – 2 – 3                                                                                  | 1 – 2 – 3                                                                                                      | <input type="checkbox"/> oui <input type="checkbox"/> non                                                |
| La prise en compte de mon point de vue<br>dans les décisions concernant ma maladie                                                                                  | 0 – 1 – 2 – 3                                                                                                | <input type="checkbox"/> oui<br><input type="checkbox"/> non (je passe au thème suivant  ) | 1 – 2 – 3                                                                                  | 1 – 2 – 3                                                                                                      | <input type="checkbox"/> oui <input type="checkbox"/> non                                                |
| Ma situation financière                                                                                                                                             | 0 – 1 – 2 – 3                                                                                                | <input type="checkbox"/> oui<br><input type="checkbox"/> non                               | 1 – 2 – 3                                                                                  | 1 – 2 – 3                                                                                                      | <input type="checkbox"/> oui <input type="checkbox"/> non                                                |
